# Supplementary material
Source: ML conference proceedings conference paper supplement (https://proceedings.neurips.cc/paper_files/paper/2021/hash/23451391cd1399019fa0421129066bc6-Abstract.html)
Supplement: Supplementary file 1 [file 23451391cd1399019fa0421129066bc6-Supplemental.pdf]

---

# Supplementary to “Instance-dependent Label-noise Learning under a Structural Causal Model”

---

Yu Yao<sup>1</sup> Tongliang Liu<sup>1†</sup> Mingming Gong<sup>2</sup>  
 Bo Han<sup>3</sup> Gang Niu<sup>4</sup> Kun Zhang<sup>5</sup>

<sup>1</sup>TML Lab, University of Sydney; <sup>2</sup>University of Melbourne; <sup>3</sup>Hong Kong Baptist University;  
<sup>4</sup>RIKEN AIP; <sup>5</sup>Carnegie Mellon University

## Appendix

### Appendix A: Derivation Details of evidence lower-bound (ELBO)

In this section, we show the derivation details of  $\text{ELBO}(x, \tilde{y})$ . Recall that the causal decomposition of the instance-dependent label noise is

$$P(X, \tilde{Y}, Y, Z) = P(Y)P(Z)P(X|Y, Z)P(\tilde{Y}|Y, X).$$

Our encoders model following distributions

$$q_\phi(Z, Y|X) = q_{\phi_2}(Z|Y, X)q_{\phi_1}(Y|X),$$

and decoders model the following distributions

$$p_\theta(X, \tilde{Y}|Y, Z) = p_{\theta_1}(X|Y, Z)p_{\theta_2}(\tilde{Y}|Y, X).$$

Now, we start with maximizing the log-likelihood  $p_\theta(x, \tilde{y})$  of each datapoint  $(x, \tilde{y})$ .

$$\begin{aligned} \log p_\theta(x, \tilde{y}) &= \log \int_z \int_y p_\theta(x, \tilde{y}, z, y) dy dz \\ &= \log \int_z \int_y p_\theta(x, \tilde{y}, z, y) \frac{q_\phi(z, y|x)}{q_\phi(z, y|x)} dy dz \\ &= \log \mathbb{E}_{(z, y) \sim q_\phi(Z, Y|x)} \left[ \frac{p_\theta(x, \tilde{y}, z, y)}{q_\phi(z, y|x)} \right] \\ &\geq \mathbb{E}_{(z, y) \sim q_\phi(Z, Y|x)} \left[ \log \frac{p_\theta(x, \tilde{y}, z, y)}{q_\phi(z, y|x)} \right] := \text{ELBO}(x, \tilde{y}) \\ &= \mathbb{E}_{(z, y) \sim q_\phi(Z, Y|x)} \left[ \log \frac{p(z)p(y)p_{\theta_1}(x|y, z)p_{\theta_2}(\tilde{y}|y, x)}{q_\phi(z, y|x)} \right] \\ &= \mathbb{E}_{(z, y) \sim q_\phi(Z, Y|x)} [\log(p_{\theta_1}(x|y, z))] + \mathbb{E}_{(z, y) \sim q_\phi(Z, Y|x)} [\log(p_{\theta_2}(\tilde{y}|y, x))] \\ &\quad + \mathbb{E}_{(z, y) \sim q_\phi(Z, Y|x)} \left[ \log \left( \frac{p(z)p(y)}{q_{\phi_2}(z|y, x)q_{\phi_1}(y|x)} \right) \right] \end{aligned} \tag{1}$$

The  $\text{ELBO}(x, \tilde{y})$  above can be further simplified. Specifically,

$$\begin{aligned} \mathbb{E}_{(z, y) \sim q_\phi(Z, Y|x)} [\log(p_{\theta_2}(\tilde{y}|y, x))] &= \mathbb{E}_{y \sim q_{\phi_1}(Y|x)} \mathbb{E}_{z \sim q_{\phi_2}(Z|y, x)} [\log(p_{\theta_2}(\tilde{y}|y, x))] \\ &= \mathbb{E}_{y \sim q_{\phi_1}(Y|x)} [\log(p_{\theta_2}(\tilde{y}|y, x))], \end{aligned} \tag{2}$$

---

<sup>†</sup>Correspondence to Tongliang Liu (tongliang.liu@sydney.edu.au).

and similarly,

$$\begin{aligned}
& \mathbb{E}_{(z,y)\sim q_\phi(Z,Y|x)} \left[ \log \left( \frac{p(z)p(y)}{q_{\phi_2}(z|y,x)q_{\phi_1}(y|x)} \right) \right] \\
&= \mathbb{E}_{y\sim q_{\phi_1}(Y|x)} \mathbb{E}_{z\sim q_{\phi_2}(Z|y,x)} \left[ \log \left( \frac{p(z)p(y)}{q_{\phi_2}(z|y,x)q_{\phi_1}(y|x)} \right) \right] \\
&= \mathbb{E}_{y\sim q_{\phi_1}(Y|x)} \mathbb{E}_{z\sim q_{\phi_2}(Z|y,x)} \left[ \log \left( \frac{p(y)}{q_{\phi_1}(y|x)} \right) \right] + \mathbb{E}_{y\sim q_{\phi_1}(Y|x)} \mathbb{E}_{z\sim q_{\phi_2}(Z|y,x)} \left[ \log \left( \frac{p(z)}{q_{\phi_2}(z|y,x)} \right) \right] \\
&= \mathbb{E}_{y\sim q_{\phi_1}(Y|x)} \left[ \log \left( \frac{p(y)}{q_{\phi_1}(y|x)} \right) \right] + \mathbb{E}_{y\sim q_{\phi_1}(Y|x)} \mathbb{E}_{z\sim q_{\phi_2}(Z|y,x)} \left[ \log \left( \frac{p(z)}{q_{\phi_2}(z|y,x)} \right) \right] \\
&= -kl(q_{\phi_1}(Y|x)\|p(Y)) - \mathbb{E}_{y\sim q_{\phi_1}(Y|x)} [kl(q_\phi(Z|y,x)\|p(Z))], \tag{3}
\end{aligned}$$

By combing Eq. 1, Eq. 2 and Eq. 3, we get

$$\begin{aligned}
\text{ELBO}(x, \tilde{y}) &= \mathbb{E}_{(z,y)\sim q_\phi(Z,Y|x)} [\log p_{\theta_1}(x|y, z)] + \mathbb{E}_{y\sim q_{\phi_1}(Y|x)} [\log p_{\theta_2}(\tilde{y}|y, x)] \\
&\quad - kl(q_{\phi_1}(Y|x)\|p(Y)) - \mathbb{E}_{y\sim q_{\phi_1}(Y|x)} [kl(q_\phi(Z|y, x)\|p(Z))],
\end{aligned}$$

which is the ELBO in our main paper.

## Appendix B: Loss Functions

In this section, we provide the empirical solution of the ELBO and co-teaching loss. Remind that our encoder networks and decoder networks in the the first branch are defined as follows

$$Y_1 = \hat{q}_{\phi_1^1}(X), \quad Z_1 \sim \hat{q}_{\phi_2^1}(X, Y_1), \quad X_1 = \hat{p}_{\theta_1^1}(Y_1, Z_1), \quad \tilde{Y}_1 = \hat{p}_{\theta_2^1}(X_1, Y_1),$$

Let  $S$  be the noisy training set, and  $d^2$  be the dimension of an instance  $x$ . Let  $y_1$  and  $z_1$  be the estimated clean label and latent representation for the instance  $x$ , respectively, by the first branch. As mentioned in our main paper (see Section 3.2), the negative ELBO loss is to minimize 1). a reconstruction loss between each instance  $x$  and  $\hat{p}_{\theta_1^1}(x, y_1)$ ; 2). a cross-entropy loss between noisy labels  $\hat{p}_{\theta_2^1}(x_1, x_1)$  and  $\tilde{y}$ ; 3). a cross-entropy loss between  $\hat{q}_{\phi_2^1}(x, y_1)$  and uniform distribution  $P(Y)$ ; 4). a cross-entropy loss between  $\hat{q}_{\phi_1^1}(x, y_1)$  and Gaussian distribution  $P(Z)$ . Specifically, the empirical version of the ELBO for the first branch is as follows.

$$\begin{aligned}
\sum_{(x,\tilde{y})\in S} \text{ELBO}^1(x, \tilde{y}) &= \sum_{(x,\tilde{y})\in S} \left[ \beta_0 \frac{1}{d^2} \|x - \hat{p}_{\theta_1^1}(y_1, z_1)\|_1 - \beta_1 \tilde{y} \log \hat{p}_{\theta_2^1}(x_1, y_1) \right. \\
&\quad \left. + \beta_2 \hat{q}_{\phi_1^1}(x) \log \hat{q}_{\phi_1^1}(x) + \beta_3 \sum_{j=1}^J (1 + \log((\sigma_j)^2) - (\mu_j)^2 - (\sigma_j)^2) \right].
\end{aligned}$$

The hyper-parameter  $\beta_0$  and  $\beta_1$  are set to 0.1, and  $\beta_2$  are set to  $1e - 5$  because encouraging the distribution to be uniform on a small min-batch (i.e., 128) could have a large estimation error. The hyper-parameter  $\beta_3$  are set to 0.01. The empirical version of the ELBO for the second branch shares the same settings as the first branch.

For co-teaching loss, we directly follow Han et al. [1]. Intuitively, in each mini-batch data, both encoders  $\hat{q}_{\phi_1^1}(X)$  and  $\hat{q}_{\phi_2^1}(X)$  select their small-loss instances as the useful knowledge and exchange the knowledge to each other by a cross-entropy loss. The number of the small-loss instances used for training decays with respect to the training epoch. The experimental settings for co-teaching loss are the same as the settings in the original paper [1].

## Appendix C: More Experimental Settings

In this section, we summarize the network structures for different datasets. The network structure for modeling  $q_{\phi_1}(Y|X)$  and the dimension of the latent representation  $Z$  has been discussed in our main paper. For the optimization method, we use Adam with the default learning rate  $1e - 3$  in Pytorch. The source code has been included in our supplementary material.

For *FashionMNIST* [3], *SVHN* [2], *CIFAR10* and *CIFAR100*, we use the same number of hidden layers and feature maps. Specifically, 1). we model  $q_{\phi_2}(Z|Y, X)$  and  $p_{\theta_2}(\tilde{Y}|Y, X)$  by two 4-hidden-layer convolutional networks, and the corresponding feature maps are 32, 64, 128 and 256; 2). we model  $p_{\theta_1}(X|Y, Z)$  by a 4-hidden-layer transposed-convolutional network, and the corresponding feature maps are 256, 128, 64 and 32. We ran 150 epochs for each experiment on these datasets.

For *Clothing1M* [4], 1). we model  $q_{\phi_2}(Z|Y, X)$  and  $p_{\theta_2}(\tilde{Y}|Y, X)$  by two 5-hidden-layer convolutional networks, and the corresponding feature maps are 32, 64, 128, 256, 512; 2). we model  $p_{\theta_1}(X|Y, Z)$  by a 5-hidden-layer transposed-convolutional network, and the corresponding feature maps are 512, 256, 128, 64 and 32. We ran 40 epochs on *Clothing1M*.

## References

- [1] Bo Han, Quanming Yao, Xingrui Yu, Gang Niu, Miao Xu, Weihua Hu, Ivor Tsang, and Masashi Sugiyama. Co-teaching: Robust training of deep neural networks with extremely noisy labels. In *NeurIPS*, pages 8527–8537, 2018.
- [2] Yuval Netzer, Tao Wang, Adam Coates, Alessandro Bissacco, Bo Wu, and Andrew Y. Ng. Reading digits in natural images with unsupervised feature learning. In *NIPS Workshop on Deep Learning and Unsupervised Feature Learning*, 2011.
- [3] Han Xiao, Kashif Rasul, and Roland Vollgraf. Fashion-mnist: a novel image dataset for benchmarking machine learning algorithms. *arXiv preprint arXiv:1708.07747*, 2017.
- [4] Tong Xiao, Tian Xia, Yi Yang, Chang Huang, and Xiaogang Wang. Learning from massive noisy labeled data for image classification. In *CVPR*, pages 2691–2699, 2015.
